# Supplementary material for: Effects of Different Inhalation Therapy on Ventilator-Associated Pneumonia in Ventilated COVID-19 Patients: A Randomized Controlled Trial
Source: MDPI journal article supplement (doi:10.3390/microorganisms10061118), 2022-05-28
Supplement: s1 [file s1]

## Supplementary Material

**Supplementary Table S1.** Comparison of laboratory parameters between the study groups.

| Variables                                 | Inhalation Type                                   |                                                 |                                          |                                                           | <i>p</i> -Value * |
|-------------------------------------------|---------------------------------------------------|-------------------------------------------------|------------------------------------------|-----------------------------------------------------------|-------------------|
|                                           | Control Group - No<br>Inhalation<br>(n=52; 29.7%) | N-Acetylcysteine<br>Inhalation<br>(n=39; 22.3%) | 5% Saline<br>Inhalation<br>(n=42; 24.0%) | 8.4% Sodium<br>Bicarbonate<br>Inhalation<br>(n=42; 24.0%) |                   |
| <b>pH (initial)</b>                       | 7.45 (7.44-7.50)                                  | 7.46 (7.42-7.52)                                | 7.45 (7.43-7.49)                         | 7.48 (7.45-7.50)                                          | 0.622             |
| <b>pCO<sub>2</sub> (kPa; initial)</b>     | 4.5 (4.1-5.6)                                     | 4.6 (4.1-5.8)                                   | 4.7 (4.2-5.1)                            | 4.4 (4.3-4.8)                                             | 0.344             |
| <b>pO<sub>2</sub> (kPa; initial)</b>      | 5.9 (5.5-6.8)                                     | 6.7 (5.9-7.6)                                   | 6.4 (5.1-7.9)                            | 6.5 (5.9-7.5)                                             | 0.486             |
| <b>SpO<sub>2</sub> (%; initial)</b>       | 82.8 (78.2-88.7)                                  | 82.9 (79.9-89.4)                                | 86.5 (75.7-89.5)                         | 86.1 (81.5-90.4)                                          | 0.583             |
| <b>HCO<sub>3</sub> (mmol/l; initial)</b>  | 25.3 (23.7-27.6)                                  | 24.6 (22.0-28.6)                                | 24.5 (22.0-26.0)                         | 25.8 (23.1-27.8)                                          | 0.316             |
| <b>Base excess (initial)</b>              | 1.0 (-0.9-5.0)                                    | 1.3 (-1.7-5.9)                                  | -0.5 (-2.2-3.8)                          | 3.4 (-1.8-4.3)                                            | 0.546             |
| <b>hsTnT (maximal)</b>                    | 20.4 (14.5-39.4)                                  | 14.5 (9.8-66.1)                                 | 17.4 (11.8-25.6)                         | 18.5 (10.8-38.6)                                          | 0.555             |
| <b>NTproBNP (maximal)</b>                 | 848.0 (399.0-2003.5)                              | 1142.0 (353.0-1726.5)                           | 567.0 (251.3-<br>1254.8)                 | 633.5 (281.0-4490.0)                                      | 0.406             |
| <b>Red blood cells (x10<sup>12</sup>)</b> | 4.5 (4.2-4.8)                                     | 4.0 (3.8-4.5)                                   | 4.6 (4.3-4.9)                            | 4.5 (4.1-5.3)                                             | 0.288             |
| <b>Hemoglobin (g/l)</b>                   | 136.0 (121.5-148.5)                               | 116.5 (108.3-132.3)                             | 131.0 (124.5-149.8)                      | 130.5 (122.5-153.5)                                       | 0.099             |
| <b>MCV (fl)</b>                           | 90.3 (87.7-92.3)                                  | 89.5 (84.4-91.3)                                | 87.1 (84.5-91.2)                         | 90.6 (86.6-94.4)                                          | 0.652             |
| <b>RDW</b>                                | 13.9 (13.2-14.5)                                  | 13.7 (13.4-14.6)                                | 13.5 (12.9-13.8)                         | 13.7 (13.0-14.2)                                          | 0.537             |
| <b>Platelets (x10<sup>9</sup>)</b>        | 214.0 (165.5-286.0)                               | 331.0 (143.3-456.3)                             | 275.5 (202.5-339.3)                      | 262.5 (222.3-323.3)                                       | 0.201             |

|                                                  |                     |                     |                     |                     |       |
|--------------------------------------------------|---------------------|---------------------|---------------------|---------------------|-------|
| <b>WBC (x10<sup>9</sup>)</b>                     | 9.3 (7.1-13.0)      | 8.3 (5.3-13.9)      | 9.3 (6.9-11.8)      | 9.1 (7.3-14.2)      | 0.188 |
| <b>Neutrophiles (x10<sup>9</sup>)</b>            | 8.0 (5.9-11.4)      | 6.8 (4.5-12.8)      | 7.5 (5.3-10.5)      | 7.8 (5.1-16.0)      | 0.372 |
| <b>Lymphocytes (x10<sup>9</sup>)</b>             | 0.6 (0.3-0.8)       | 0.6 (0.4-0.9)       | 0.6 (0.4-1.1)       | 0.5 (0.4-0.9)       | 0.763 |
| <b>CRP (mmol/l; initial)</b>                     | 93.4 (47.6-116.0)   | 99.3 (53.3-156.3)   | 78.9 (60.4-127.0)   | 77.2 (50.2-135.51)  | 0.080 |
| <b>CRP (mmol/l; maximal)</b>                     | 222.5 (137.2-330.3) | 228.0 (153.5-288.8) | 160.9 (98.5-260.6)  | 183.1 (151.6-257.4) | 0.666 |
| <b>BUN (mmol/l; initial)</b>                     | 9.6 (7.3-12.7)      | 9.3 (5.4-14.8)      | 8.4 (7.6-10.3)      | 9.1 (6.7-13.8)      | 0.768 |
| <b>Creatinine (umol/l; initial)</b>              | 90.0 (76.5-112.0)   | 66.5 (46.8-107.0)   | 79.0 (71.0-91.8)    | 82.0 (62.3-151.3)   | 0.593 |
| <b>eGFR (ml/min/1.73 m<sup>2</sup>; initial)</b> | 73.9 (52.1-87.0)    | 79.1 (58.2-101.4)   | 86.6 (70.2-91.6)    | 84.0 (41.7-98.1)    | 0.723 |
| <b>AST (mmol/l; initial)</b>                     | 53.0 (38.5-92.0)    | 43.0 (35.3-60.3)    | 40.0 (32.3-70.3)    | 56.5 (37.3-75.3)    | 0.318 |
| <b>ALT (mmol/l; initial)</b>                     | 52.0 (31.0-72.5)    | 42.5 (23.8-52.0)    | 37.0 (24.3-55.0)    | 43.5 (23.8-61.3)    | 0.318 |
| <b>GGT (mmol/l; initial)</b>                     | 64.0 (36.0-113.0)   | 55.0 (31.0-100.0)   | 66.5 (29.5-82.8)    | 41.0 (24.3-75.3)    | 0.190 |
| <b>LDH (mmol/l; initial)</b>                     | 548.0 (374.5-648.5) | 528.0 (431.5-718.3) | 486.0 (415.3-634.0) | 589.0 (447.5-713.0) | 0.580 |
| <b>D-dimers (mmol/l; initial)</b>                | 1.4 (0.8-5.0)       | 1.6 (0.7-10.4)      | 1.3 (0.8-5.7)       | 7.7 (2.1-16.6)      | 0.223 |
| <b>INR (units)</b>                               | 1.0 (0.9-1.1)       | 1.0 (0.9-1.1)       | 1.0 (0.9-1.1)       | 1.0 (1.0-1.2)       | 0.390 |
| <b>Sodium (mmol/l)</b>                           | 138.0 (134.0-140.5) | 139.5 (137.0-142.3) | 137.5 (133.0-141.8) | 139.0 (137.8-141.8) | 0.773 |
| <b>Chloride (mmol/l)</b>                         | 100.0 (92.5-104.0)  | 104.5 (99.8-106.0)  | 100.5 (95.5-103.8)  | 102.0 (98.8-105.0)  | 0.728 |
| <b>Potassium (mmol/l)</b>                        | 4.3 (3.9-4.8)       | 4.1 (3.6-4.5)       | 4.4 (3.9-4.6)       | 4.1 (3.8-4.7)       | 0.852 |
| <b>Calcium (mmol/l)</b>                          | 2.0 (1.9-2.1)       | 2.0 (1.7-2.0)       | 1.9 (1.9-2.0)       | 1.9 (1.9-2.0)       | 0.797 |
| <b>Phosphorus (mmol/l)</b>                       | 1.0 (0.8-1.3)       | 1.1 (0.7-1.3)       | 1.0 (0.9-1.2)       | 1.3 (0.8-1.5)       | 0.712 |
| <b>Protein (g/l)</b>                             | 57.0 (53.0-63.0)    | 54.5 (51.5-58.3)    | 58.5 (54.0-62.3)    | 57.5 (53.8-63.0)    | 0.182 |
| <b>Albumin (g/l)</b>                             | 29.2 (28.1-32.0)    | 27.5 (25.1-32.1)    | 30.2 (29.9-32.9)    | 29.9 (27.1-32.4)    | 0.154 |

**Glucose (mmol/l)**

10.4 (7.2-13.3)

8.1 (6.4-12.2)

9.8 (7.2-13.9)

7.9 (7.5-10.9)

0.483

---

Data are expressed as number (percent) or median (interquartile range). \* Kruskal Wallis test. **Abbreviations:** ALT – alanine aminotransferase; AST – aspartate aminotransferase; BUN – blood urea nitrogen; CRP – C-reactive protein; eGFR – estimated glomerular filtration rate; LDH – lactate dehydrogenase; GGT – gamma glutamyl transferase; HCO<sub>3</sub> – bicarbonate; INR – international normalized ratio; hsTnT – high-sensitivity troponin; MCV – mean corpuscular volume; pO<sub>2</sub> – oxygen partial pressure; pCO<sub>2</sub> – carbon dioxide partial pressure; SpO<sub>2</sub> – oxygen saturation; RDW – red cell distribution width; WBC – white blood cells.

**Supplementary Table S2.** Predictors of any fungal isolation.

| Variables                                | Univariate Analysis |                 | Multivariate Analysis |                 |
|------------------------------------------|---------------------|-----------------|-----------------------|-----------------|
|                                          | OR (95% CI)         | <i>p</i> -Value | aOR (95% CI)          | <i>p</i> -Value |
| Age                                      | 1.03 (0.99-1.06)    | 0.122           | 1.02 (0.97-1.07)      | 0.489           |
| Female sex                               | 1.95 (0.96-3.93)    | 0.064           | 2.29 (0.87-6.04)      | 0.093           |
| Duration of ventilator therapy<br>(days) | 1.04 (1.01-1.07)    | 0.015           | 1.05 (1.01-1.10)      | 0.028           |
| Hospitalization duration (days)          | 1.02 (1.00-1.04)    | 0.063           | 0.99 (0.97-1.02)      | 0.413           |
| Charlson Comorbidity Index               | 1.11 (0.92-1.35)    | 0.290           | 0.92 (0.67-1.28)      | 0.628           |
| Prior smoking                            | 0.62 (0.26-1.47)    | 0.276           | 0.92 (0.33-2.57)      | 0.877           |
| Albumin (g/l)                            | 1.02 (0.93-1.12)    | 0.655           | 0.98 (0.88-1.10)      | 0.78            |
| Glucose (mmol/l)                         | 1.01 (0.95-1.08)    | 0.663           | 1.03 (0.94-1.12)      | 0.565           |

**Abbreviations:** OR – odds ratios; aOR – adjusted odds ratios.

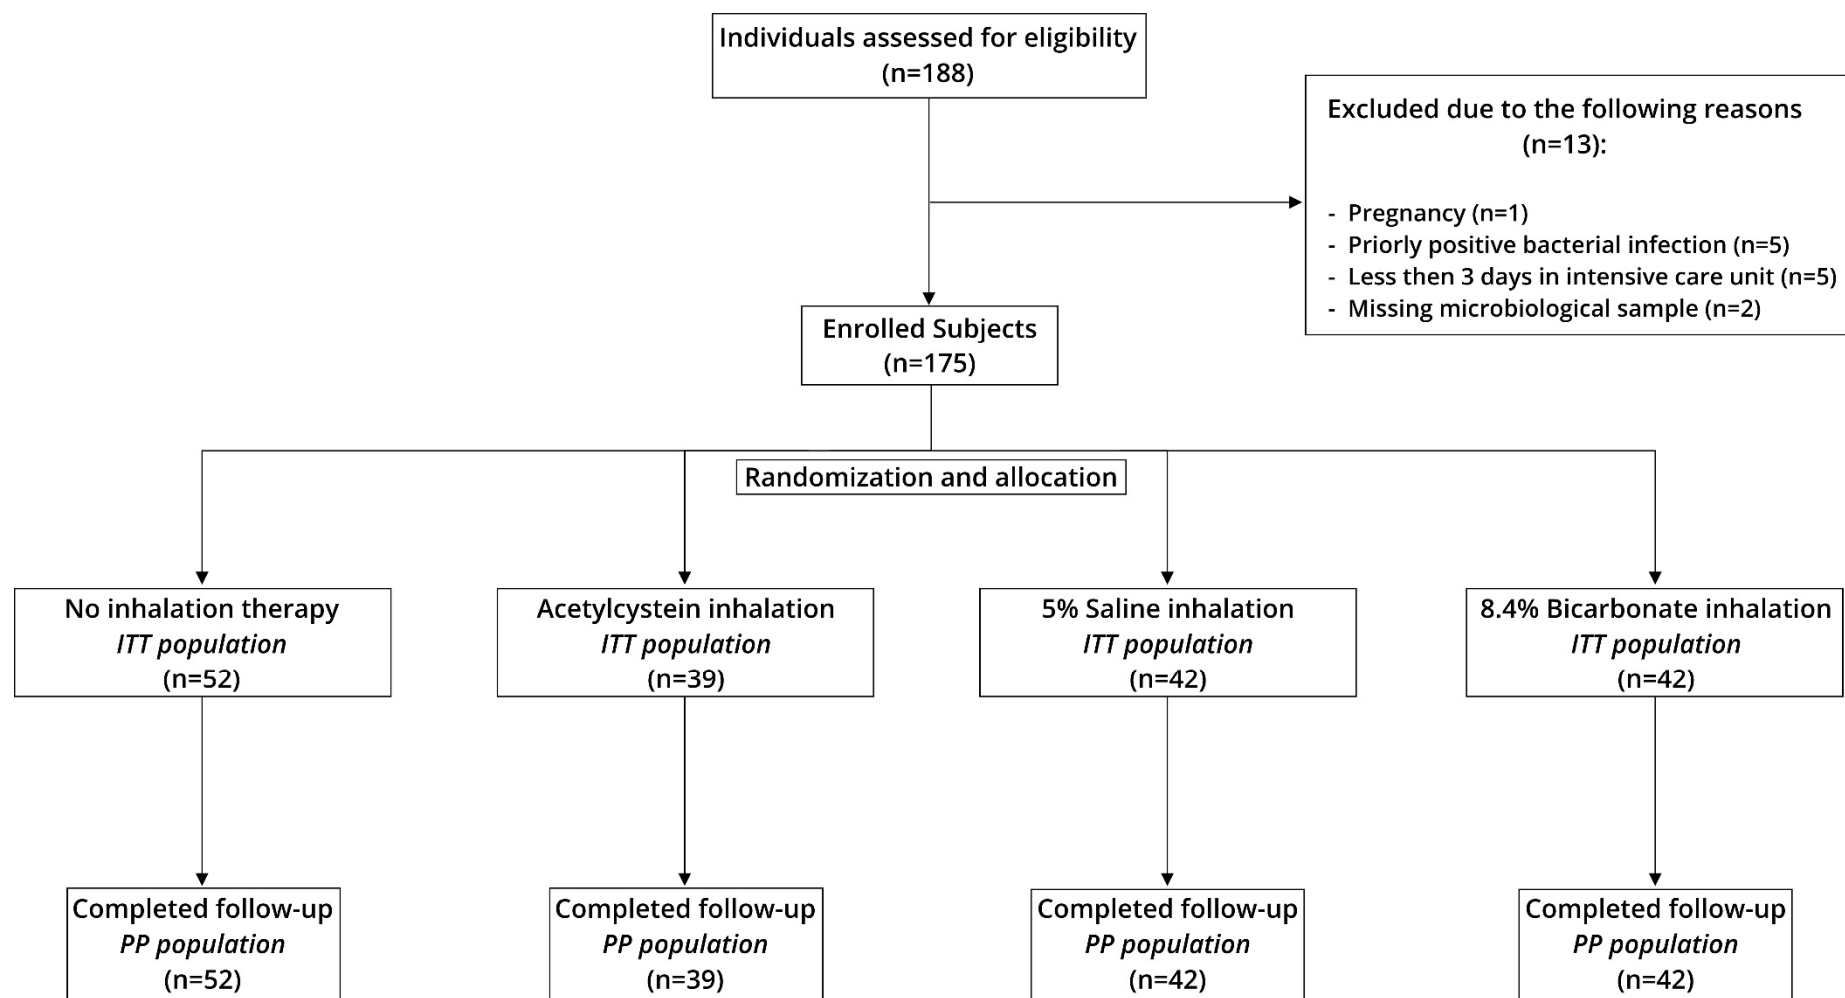

**Supplementary Figure S1. Flow diagram.** Abbreviations: none.
